# Supplementary material for: Electrical Transport Measurements on Layered La(O,F)BiS2 under Extremely High Pressure
Source: MDPI journal article supplement (doi:10.3390/condmat7010025), 2022-03-02
Supplement: s1 [file s1]

Archive with 1 entries (1 files):
- condensedmatter-1589069-supplementary.pdf
