# Supplementary material for: Electrical Transport Measurements on Layered La(O,F)BiS2 under Extremely High Pressure
Source: MDPI journal article supplement (doi:10.3390/condmat7010025), 2022-03-02
Supplement: s1 [file s1 › condensedmatter-1589069-supplementary.pdf]

## Supplemental information

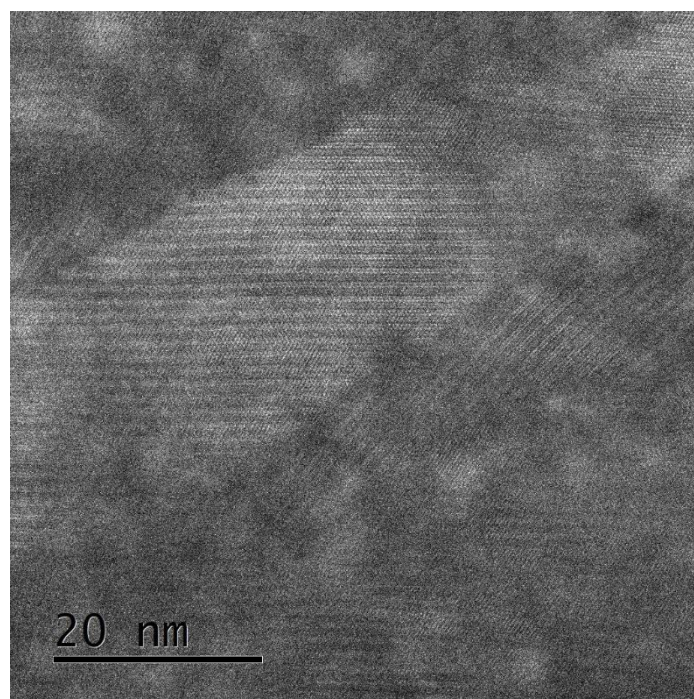

Figure S1. Wide view of high-angle annular dark field scanning TEM images for the recovered samples.

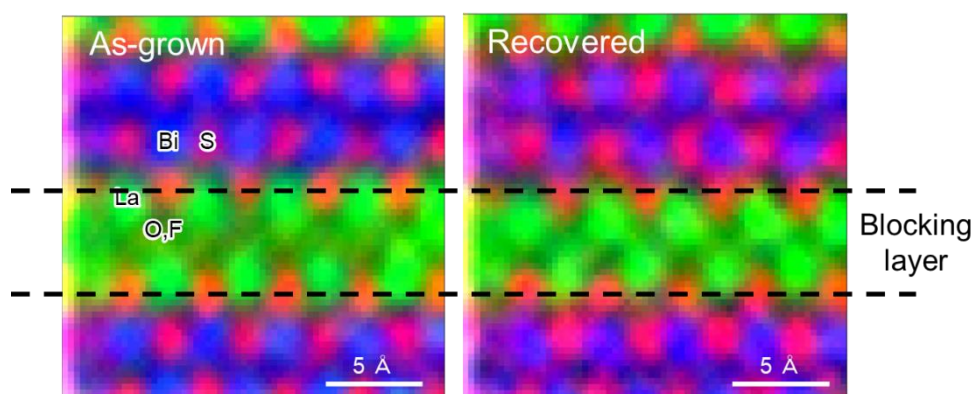

Figure S2. Comparison between two EDX mapping images with a guideline of the blocking layers.
